# Supplementary material
Source: Research Square preprint supplement (doi:10.21203/rs.3.rs-9249309/v1)
Supplement: Supplementary file 1 [file de608d7029bce1019dd8458b.pdf]

**Article Title:** Delineating Groundwater Potential Zones in Tropical Hard-Rock Aquifers Using Machine and Deep Learning, Spatial Cross-Validation, and Spatially Explicit Uncertainty Analysis

**Journal Name:** Earth Science Informatics

**Author Names:** Suraj Dule<sup>1</sup>, Arabinda Sharma\*<sup>1</sup>

**Affiliation and E-mail of Corresponding Author:**

<sup>1</sup> *School of Geography, Gangadhar Meher University, Sambalpur, Odisha, India*

*\*Email: arbind\_78@rediffmail.com*

### Online Resource 1: Supplementary Tables

**Table S1** Hyperparameter search spaces, distributions, and final optimized values selected via the Optuna framework.

| Model                         | Hyperparameter    | Search Range /<br>Distribution | Final Value* | Description                                      |
|-------------------------------|-------------------|--------------------------------|--------------|--------------------------------------------------|
| Random<br>Forest<br>(RF)      | n_estimators      | 300 – 1200 (Int)               | 1184         | Number of trees in the forest.                   |
|                               | max_depth         | 5 – 16 (Int)                   | 15           | Maximum depth of the tree.                       |
|                               | max_features      | 0.2 – 0.8 (Float)              | 0.38         | Fraction of features to consider at each split.  |
|                               | min_samples_split | 20 – 40 (Int)                  | 22           | Min. samples required to split an internal node. |
|                               | min_samples_leaf  | 1 – 15 (Int)                   | 2            | Min. samples required to be at a leaf node.      |
|                               | bootstrap         | [True]                         | True         | Whether bootstrap samples are used.              |
| XGBoost<br>(Standard<br>& SF) | n_estimators      | 400 – 1200 (Int)               | 1082         | Number of gradient boosted trees.                |

---

|                              |                          |                            |       |                                                   |
|------------------------------|--------------------------|----------------------------|-------|---------------------------------------------------|
|                              | max_depth                | 4 – 8 (Int)                | 7     | Maximum tree depth for base learners.             |
|                              | learning_rate ( $\eta$ ) | 0.01 – 0.3 (Log-Uniform)   | 0.018 | Step size shrinkage used in update.               |
|                              | subsample                | 0.5 – 1.0 (Uniform)        | 0.68  | Subsample ratio of the training instances.        |
|                              | colsample_bytree         | 0.3 – 1.0 (Uniform)        | 0.74  | Subsample ratio of columns per tree.              |
|                              | gamma                    | 1.5 – 3.5 (Uniform)        | 1.92  | Min. loss reduction required to make a partition. |
|                              | reg_alpha (L1)           | 0.1 – 10.0 (Log-Uniform)   | 0.24  | L1 regularization term on weights.                |
|                              | reg_lambda (L2)          | 0.1 – 10.0 (Log-Uniform)   | 1.85  | L2 regularization term on weights.                |
| CatBoost                     | iterations               | 400 – 1500 (Int)           | 1350  | The maximum number of trees built.                |
|                              | depth                    | 4 – 12 (Int)               | 8     | Depth of the tree.                                |
|                              | learning_rate            | 0.01 – 0.2 (Log-Uniform)   | 0.042 | Learning rate.                                    |
|                              | l2_leaf_reg              | 0.001 – 10.0 (Log-Uniform) | 3.5   | Coefficient at the L2 regularization term.        |
|                              | rsm                      | 0.3 – 1.0 (Uniform)        | 0.88  | Random subspace method (colsample).               |
| Support Vector Machine (SVM) | C                        | 0.1 – 20.0 (Log-Uniform)   | 8.4   | Regularization parameter.                         |
|                              | gamma                    | 0.0001 – 0.1 (Log-Uniform) | 0.03  | Kernel coefficient for 'rbf'.                     |

---

|                        |                         |      |                                                       |
|------------------------|-------------------------|------|-------------------------------------------------------|
| epsilon ( $\epsilon$ ) | 0.1 – 1.0 (Log-Uniform) | 0.15 | Epsilon in the $\epsilon$ -insensitive loss function. |
|------------------------|-------------------------|------|-------------------------------------------------------|

\*Final values correspond to the configuration yielding the highest spatial cross-validation  $R^2$  score.

**Table S2** Fixed architectural configuration and training hyperparameters for the Multi-Layer Perceptron Deep Learning (MLP-DL) model.

| Component             | Configuration       | Description                                                  |
|-----------------------|---------------------|--------------------------------------------------------------|
| Backbone Architecture | [256, 256, 128, 64] | Layer-wise hidden dimensions of the residual MLP.            |
| Optimization          | Adam (lr=5e-4)      | Adaptive Moment Estimation optimizer.                        |
| Batch Size            | 32                  | Number of samples per gradient update step.                  |
| Regularization        | Dropout (p=0.1)     | Probability of element-wise zeroing for regularization.      |
| Embedding Strategy    | $N_{unique}/2$      | Factor to determine embedding size for categorical features. |

**Table S3** Variance Inflation Factor (VIF) Results.

| Feature       | VIF (Base) | VIF (XGBoost-SF) | Interpretation                                 |
|---------------|------------|------------------|------------------------------------------------|
| GWPZ Gradient | N/A        | 72,139.30        | Extreme Multicollinearity (with Slope)         |
| Slope         | 1.13       | 71,660.94        | Extreme Multicollinearity (with GWPZ Gradient) |
| Elevation     | 1.83       | 8,081.75         | Extreme Multicollinearity (with GWPZ Mean)     |
| GWPZ Mean     | N/A        | 8,075.25         | Extreme Multicollinearity (with Elevation)     |
| GWPZ Std      | N/A        | 8.85             | High Correlation                               |
| Runoff        | 5.25       | 5.27             | High Correlation                               |
| Rainfall      | 4.56       | 4.72             | Moderate Correlation                           |
| NDVI          | 1.88       | 1.90             | Low Correlation                                |

---

|                   |      |      |                 |
|-------------------|------|------|-----------------|
| Mean WL           | 1.67 | 1.68 | Low Correlation |
| Drainage Density  | 1.54 | 1.57 | Low Correlation |
| Lineament Density | 1.16 | 1.20 | Low Correlation |

---
